# Supplementary material
Source: PubMed Central journal article supplement (PMC1586032)
Supplement: plntphys_pp.106.083865_1.pdf [file plntphys_pp.106.083865_1.pdf]

## Supplemental data

Supplemental Figure 1. Segregation analysis of *S-RNases* of the ‘Goldrich’ x ‘Currot’ progeny.

Supplemental Figure 2. Alignment of the amino acidic sequences of S-RNases from several *Prunus* species carried out with CLUSTALX (Thompson et al., 1997). Sequences used were the following: EMBL/DDJB/GenBank accession numbers: *Par-S*<sub>1</sub> (AY587561), *Par-S*<sub>2</sub> (AY587562), *Par-S*<sub>4</sub> (AY587564), *Par-S*<sub>C</sub> (DQ422947), *Pa-S*<sub>3</sub> (AB010306), *Pa-S*<sub>6</sub> (AB010305), *Pm-S*<sub>1</sub> (AB101438), *Pm-S*<sub>7</sub> (AB101439), *Pd-Sa* (AB026836) and *Pd-Sb* (AB011469).

Supplemental Figure 3. Search of *SFB* genetic duplications in the cultivar ‘Canino’ (*S*<sub>2</sub>*S*<sub>C</sub>) by CAPS analysis with *EcoRI-NdeI*.

Supplemental Figure 4. Molecular characterization of *ParFB* alleles. Sequences used for the alignments were: *Par-SFB*<sub>1</sub> (AY587563), *Par-SFB*<sub>2</sub> (AY587562), *Par-SFB*<sub>4</sub> (AY587565) (Romero et al., 2004), *Par-FB*<sub>1</sub> (DQ422943), *Par-FB*<sub>2</sub> (DQ422944) and *Par-FB*<sub>3</sub> (DQ422946) (this work).
